# Supplementary material
Source: HighWire-hosted journal article supplement (https://bjo.bmj.com/content/101/11/1535)
Supplement: inline-supplementary-material-2 [file inline-supplementary-material-2.pdf]

Supplementary Table1. Newcastle-Ottawa scale in non-randomized studies

|                | Selection |    |    |    | Comparability | Outcome |    |    | Quality Score |
|----------------|-----------|----|----|----|---------------|---------|----|----|---------------|
|                | 1)        | 2) | 3) | 4) | 1)            | 1)      | 2) | 3) |               |
| Kwok 2005      | *         | *  | *  | *  | /             | *       | *  | *  | 7*            |
| Liu 2005       | *         | *  | *  | *  | *             | *       | *  | *  | 8*            |
| Shimada 2009   | *         | *  | *  | *  | *             | *       | *  | *  | 8*            |
| Lee 2010       | *         | *  | *  | *  | **            | *       | *  | *  | 9*            |
| Pournaras 2011 | *         | *  | *  | *  | **            | *       | *  | *  | 9*            |
| Kumagai 2012   | *         | *  | *  | *  | *             | *       | *  | *  | 8*            |
| Oh 2013        | *         | *  | *  | *  | **            | *       | *  | *  | 9*            |
| Chang 2013     | /         | *  | *  | *  | **            | *       | *  | *  | 8*            |
| Ahn 2014       | *         | *  | *  | *  | *             | *       | *  | *  | 8*            |
| Schechet 2016  | *         | *  | *  | *  | *             | *       | *  | *  | 8*            |
| Jung 2016      | *         | *  | *  | *  | **            | *       | *  | *  | 9*            |

The scale rates studies according to the categories of selection, comparability, and exposure (case-control assessment) or outcome (cohort assessment). Four stars are available from the selection category, 2 stars are available from the comparability section, and 3 stars can be achieved in the exposure and outcome categories.
