# Supplementary material
Source: HighWire-hosted journal article supplement (https://bjo.bmj.com/content/101/11/1535)
Supplement: inline-supplementary-material-4 [file inline-supplementary-material-4.pdf]

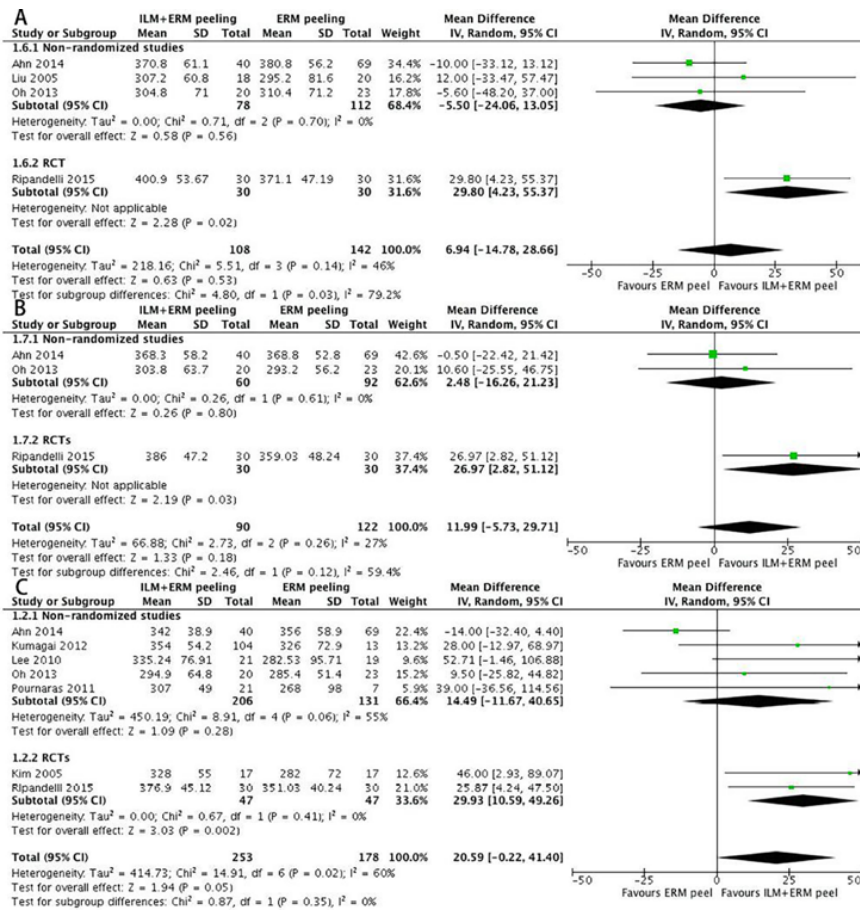

Supplementary Figure 2. Forest plot comparing CMT at 3 months (A), 6 months (B), and final follow-up (mean 8.9~23.55 months) (C) between the ILM peeling and non ILM peeling groups in all included studies, non-randomized studies, and RCTs.
