# Supplementary material
Source: HighWire-hosted journal article supplement (https://bjo.bmj.com/content/101/11/1535)
Supplement: inline-supplementary-material-5 [file inline-supplementary-material-5.pdf]

Supplementary Table 2. Summary of GRADE Quality of Evidence for the Outcomes Assessed in Meta-Analysis

| Outcome                 | Risk of Bias | Inconsistency | Indirectness | Imprecision | Other | Quality of Evidence |
|-------------------------|--------------|---------------|--------------|-------------|-------|---------------------|
| Primary outcomes        |              |               |              |             |       |                     |
| BCVA at 12 months       | Not serious  | Not serious   | Not serious  | Not serious | None  | High                |
| CMT at 12 months        | Not serious  | Serious*      | Serious      | Not serious | None  | Low                 |
| ERM recurrence          | Not serious  | Not Serious   | Not serious  | Not serious | None  | High                |
| Reoperation rate        | Not serious  | Not serious   | Not serious  | Serious     | None  | Moderate            |
| Secondary outcomes      |              |               |              |             |       |                     |
| BCVA at 3,6 months      | Not serious  | Not serious   | Not serious  | Not serious | None  | High                |
| BCVA at final follow-up | Not serious  | Serious*      | Not serious  | Not serious | None  | Moderate            |
| CMT at 3months          | Not serious  | Serious       | Serious      | Not serious | None  | Low                 |
| CMT at 6 months         | Not serious  | Not serious*  | serious      | Not serious | None  | Moderate            |
| CMT at final follow-up  | Not serious  | Serious*      | Not serious  | Not serious | None  | Moderate            |

\*I<sup>2</sup> greater than 40%.
